# 1 **Chromomycin A<sub>5</sub> induces bonafide immunogenic cell death in metastatic melanoma**

2 Katharine G. D. Florêncio<sup>1</sup>, Evelline A. Edson<sup>1</sup>, Francisco C. L. Pinto<sup>2</sup>, Otília D. L. Pessoa<sup>2</sup>  
3 João Agostinho Machado-Neto<sup>3</sup> and Diego V. Wilke<sup>1,\*</sup>

4

5 <sup>1</sup>Drug Research and Development Center, Department of Physiology and Pharmacology,  
6 School of Medicine, Federal University of Ceara, Ceara, Brazil, <sup>2</sup>Department of Organic and  
7 Inorganic Chemistry, Sciences Center, Federal University of Ceara, Ceara, Brazil,  
8 <sup>3</sup>Department of Pharmacology, Institute of Biomedical Sciences, University of Sao Paulo, São  
9 Paulo, Brazil.

10

## 11 **Abstract**

12 Some first-line cytotoxic chemotherapies, *e.g.* doxorubicin, paclitaxel and oxaliplatin, induce  
13 activation of the immune system through immunogenic cell death (ICD). Tumor cells  
14 undergoing ICD function as a vaccine, releasing damage-associated molecular patterns  
15 (DAMPs), which act as adjuvants, and neoantigens of the tumor are recognized as antigens.  
16 ICD induction is rare, however it yields better and long-lasting antitumor responses to  
17 chemotherapy. Advanced metastatic melanoma (AMM) is incurable for more than half of  
18 patients. The discovery of ICD inducers against AMM is an interesting drug discovery strategy  
19 with high translational potential. Here we evaluated ICD induction of four highly cytotoxic  
20 chromomycins A (CA<sub>5-8</sub>). B16-F10, a metastatic melanoma cell line, treated with CA<sub>5-8</sub> and  
21 doxorubicin exhibited ICD features such as autophagy and apoptosis, externalization of  
22 calreticulin, and releasing of HMGB1. However, CA<sub>5</sub>-treated cells had the best profile, also  
23 inducing ATP release, ERp57 externalization, phosphorylation of eIF2 $\alpha$  and altering  
24 expression of transcription of genes related to autophagy, endoplasmic reticulum stress, and  
25 apoptosis. Bonafide ICD induction by CA<sub>5</sub> was confirmed by a C57BL/6 mice vaccination

26 assay with CA<sub>5</sub>-treated cells. These findings support a high potential of CA<sub>5</sub> as an anticancer  
27 candidate against AMM.

28

29 **Keywords:** chromomycin A5; immunogenic cell death; metastatic melanoma; autophagy;  
30 anticancer.

31

32 **Abbreviations:** AMM, advanced metastatic melanoma; AO, acridine orange; APC, antigen  
33 presenting cell; AVOs, acidic vesicular organelles, CRT, calreticulin; DAMPs, damage-  
34 associated molecular patterns; eIF2 $\alpha$ , eukaryotic initiation factor 2 $\alpha$ ; ER, endoplasmic  
35 reticulum; HMGB1, high mobility group box-1; ICD, immunogenic cell death; PD-1,  
36 programmed death-1; PD-L1, programmed death-1 ligand.

37

38 **\*Corresponding author:** Diego Veras Wilke, Drug Research and Development Center,  
39 Federal University of Ceara, Fortaleza, Ceara, Brazil, 60.430-275. E-mail:

40 [diegowilke@gmail.com](mailto:diegowilke@gmail.com)

41

42

43

44

45

46

47

48

49

50

## 51 **1. Introduction**

52 Advanced metastatic melanoma (AMM) is the most aggressive skin cancer, and is a serious  
53 concern due to increasing incidence in recent decades. Chemotherapy with dacarbazine and  
54 temozolomide was the standard of care in metastatic melanoma until 2011, however with no  
55 benefit for overall survival (QUEIROLO et al., 2019). Immunological therapy with IL-2 induces  
56 long-lasting responses in a small subset of patients, albeit with a high rate of severe toxicities  
57 (ATKINS et al., 2016; QUEIROLO et al., 2019). Advances in AMM treatment have yielded  
58 better agents based on target therapies, such as BRAF and MEK inhibitors (KAKADIA et al.,  
59 2018) and immunological checkpoint inhibitors, e.g. anti-PD-L1, anti-PD-1 and anti-CTLA-4  
60 antibodies (LARKIN et al., 2015; QUEIROLO et al., 2019). Despite these advances, more  
61 than half of patients still do not experience a satisfactory clinical response. Thus translational  
62 research should pay particular attention to the non-responders subset of patients, aiming to  
63 shift immune-cold tumors into immune-hot ones (QUEIROLO et al., 2019).

64 The immunogenic effect of first-line chemotherapy and some radiotherapy treatments have  
65 been revealed as the hidden ally which improves responses of patients (KEPP et al., 2014;  
66 KROEMER et al., 2013; VANMEERBEEK et al., 2020). Treatment with inducers of  
67 immunogenic cell death (ICD) produces a specific antitumor immunity, which potentiates  
68 therapeutic efficacy (GALLUZZI et al., 2017; GARG et al., 2014; KEPP et al., 2014). ICD is a  
69 rare type of regulated cell death characterized by the activation of the adaptive immune  
70 system in the presence of cell death antigens, especially from cancer cells. Only 5% of  
71 chemotherapeutics the arsenal approved by the Food and Drug Administration of USA for  
72 cancer treatment are validated ICD inducers. However, they are first-line agents in the clinic  
73 and among the most used in the world including anthracyclines, taxanes and oxaliplatin  
74 (KEPP; SENOVILLA; KROEMER, 2014). This cell demise occurs under strong cellular stress,  
75 including autophagy and endoplasmic reticulum (ER) stress, and release of a constellation of

76 damage-associated molecular patterns (DAMPs), the signals required to recruit and activate  
77 immune cells, such as antigen-presenting cells (APCs) and lymphocytes. The most important  
78 DAMPs in ICD include ATP, high mobility box group-1 (HMBG1), a nuclear non-histone  
79 nuclear factor, chaperones, specially calreticulin, and heat-shock proteins 70 and 90, annexin  
80 A1, CXCL10 and type I interferon (KROEMER et al., 2013; RADOGNA; DICATO;  
81 DIEDERICH, 2019). In addition to *in vitro* evaluation of cell demise associated with cell stress  
82 and release of DAMPs, a vaccination assay is required to validate induction of ICD through  
83 an anti-tumor response *in vivo* (GALLUZZI et al., 2020; VANMEERBEEK et al., 2020). Clinical  
84 evidence also supports ICD as a sensitizer to PD-1/PD-L1 blockade (KEPP et al., 2019). Thus  
85 identification of ICD inducers against AMM is a promising strategy for early identification of  
86 anticancer candidates with high expectation of translational success.

87 Chromomycins and mithramycins are promising antitumor antibiotic aureolic acids  
88 (KORMANEC et al., 2020). In 1970, mithramycin was approved for use in testicular cancer  
89 (BROWN AND TORKELSON, 1995), and chronic and acute myeloid leukemia (SNYDER et  
90 al., 1991; DUTCHER et al., 1997). Recent studies have shown mithramycin inhibition of drug-  
91 resistant cancer-initiating stem cells, important players in the disease relapse (KORMANEC  
92 et al., 2020). Mithramycins also have been reported as an inhibitor of P-glycoprotein, a  
93 transmembrane efflux pump related to resistance to multiple drugs in cancer cells  
94 (TAGASHIRA et al, 2000).

95 Chromomycin A<sub>3</sub> has antitumor activity, reversibly binding to minor DNA grooves by  
96 interacting with cytosine and guanine (CG)-rich DNA regions in the presence of Mg<sup>2+</sup>,  
97 preventing replication and transcription (SUKANYA CHAKRABARTI1; BHATTACHARYYA,  
98 2000; CHAKRABORTY et al., 2014). Guimarães et al., (2014) showed chromomycin A<sub>2</sub>  
99 induces autophagy in metastatic melanoma cells, MALME-3M. The pre-apoptotic autophagy  
100 is related to the immunogenic outcome of cancer cell death (MARTINS et al., 2012). Recently

101 we obtained four cytotoxic dextrorotatory chromomycins A (CA<sub>5</sub>, CA<sub>6</sub>, CA<sub>7</sub>, and CA<sub>8</sub>) from the  
102 actinobacteria *Streptomyces* sp. BRA-384 which displayed IC<sub>50</sub> values against five tumor  
103 cells from the pM to nM range (PINTO et al., 2019). CA<sub>5</sub> binds to the transcription factor T-  
104 box 2 (TBX2), which also may be related to its antiproliferative effect and antimetastatic  
105 potential (SAHM et al., 2020). Because CA<sub>5-8</sub> are highly cytotoxic (PINTO et al., 2019) and  
106 likely to induce autophagy of melanoma cells (GUIMARÃES et al., 2014), we hypothesized  
107 these compounds were bonafide ICD inducers. Here we investigated the induction of ICD by  
108 CA<sub>5-8</sub> on an AMM model, which could mark the renaissance of chromomycins as promising  
109 anticancer agents.

110

## 111 **2. Materials & Methods**

### 112 **2.1 Reagents**

113 Chromomycins (CA<sub>5</sub>, CA<sub>6</sub>, CA<sub>7</sub>, and CA<sub>8</sub>) were obtained as previously described by Pinto et  
114 al. (2019). Doxorubicin and dimethyl sulfoxide (DMSO) were purchased from Sigma-Aldrich  
115 (Missouri, USA). All cytotoxic compounds were diluted in DMSO.

116

### 117 **2.2 Cell culture**

118 The murine metastatic melanoma B16-F10 cell line was purchased from Banco de células do  
119 Rio de Janeiro (Rio de Janeiro, Brazil) and cultured following the manufacturer's instructions.

120

### 121 **2.3 Animals**

122 We used a total of 21 C57BL/6 mice (female, 18–20 g) 6-8 weeks-old, free of ecto and  
123 endoparasites, obtained from the animal house of the Federal University of Ceara, Brazil.  
124 Animals were housed in cages under a 12:12 h light-dark cycle (lights on at 6:00 a.m.) and  
125 food and water *ad libidum*. All animal handling procedures were performed following the

126 Brazilian legislation for the use and care of laboratory animals (No 11.724/20080) after  
127 approval by the Animal Ethics Committee of the Federal University of Ceara (No  
128 3000310818).

129

#### 130 **2.4 Antiproliferative assay**

131 Sulforhodamine B (SRB) assay was performed as described by Skehan et al., 1990. CA<sub>5-8</sub>  
132 0.32 to 1000nM (CA5, CA6, CA7 and CA8 respectively), doxorubicin at 0.6 $\mu$ M (Dox) as  
133 positive control and DMSO (0.05%) as negative control were added to cells during 4h, 8h,  
134 12h, 24h, 48h and 72h and antiproliferative effect evaluated after 72h. When the exposure  
135 time was < 72h, cells were washed and replaced by fresh media (see Fig. 1). Inhibition  
136 concentration mean (IC<sub>50</sub>), total growth inhibition (TGI), and lethal concentration mean (LC<sub>50</sub>)  
137 values were calculated from cell growth percentage normalized data through interpolation of  
138 nonlinear regression using GraphPad Prism v6 (GraphPad Software, Inc., San Diego, CA,  
139 USA).

140

#### 141 **2.5 Clonogenic assay**

142 The colony-forming assay was performed according to Franken et al., 2006. Briefly, cells were  
143 seeded in 6-well plates at a density of 500 cells/well and exposed to CA<sub>5-8</sub> (CA5, CA6, CA7,  
144 and CA8), doxorubicin (Dox) or 0.05% DMSO (C-) for 24 hours. After this period, the medium  
145 with cytotoxic agents or DMSO was replaced by a fresh medium, and plates were analyzed  
146 daily until the DMSO control reached a high density of individualized colonies (approximately  
147 7 days). Cells were then washed with PBS and stained with violet crystal dye (0.5% crystal  
148 violet in methanol 50% and distilled water). Total individual colonies/well were counted under  
149 a stereoscopic microscope.

150

## 151 **2.6 Cell treatment for immunogenic cell death investigation**

152 Usually,  $2.5 \times 10^4$  cells/mL were seeded in 24-well plates for flow cytometry assays, 96-well  
153 for ATP assay, or in Petri dish plates (90 x 15 mm) for western blot and qPCR assays, and  
154 incubated for 24 h before the treatment. Then cells were exposed to CA<sub>5</sub> at 0.1 $\mu$ M (CA5),  
155 CA<sub>6</sub> at 0.25  $\mu$ M (CA6), CA<sub>7</sub> at 0.25  $\mu$ M (CA7) and CA<sub>8</sub> at 0.5  $\mu$ M (CA8), doxorubicin at 0.6  $\mu$ M  
156 (Dox), as the ICD inducer positive control, and 0.05% DMSO (C-), as the negative control,  
157 and incubated for 2 hours. After treatment, cells were collected and washed with PBS before  
158 all protocols described below.

159

## 160 **2.7 Cell viability - flow cytometry**

161 All flow cytometry assays were set to acquire 10,000 events excluding debris and doublets  
162 using a FACSVerse™ flow cytometer (BD Biosciences, San Diego, CA, USA) and FlowJo  
163 v10.6 software (Ashland, OR: Becton, Dickinson and Company) for data analysis. Cell  
164 suspensions were incubated with 2  $\mu$ g/mL 4',6-diamidino-2'-phenylindole dihydrochloride  
165 (DAPI, Sigma-Aldrich, Missouri, USA) for 10 minutes as the final step in all flow cytometry  
166 assays to distinguish membrane integrity and disruption, except for the acridine orange stain.

167

## 168 **2.8 Acidic vesicular organelles (AVOs) staining with acridine orange (AO) – flow** 169 **cytometry**

170 Differential acridine orange (AO) staining is an assay that is strongly correlated with  
171 autolysosomes formation in the late step of autophagy. The AO assay was performed as  
172 described previously (THOMÉ et al., 2016). Briefly, cells were washed with PBS and stained  
173 with 1  $\mu$ g/mL AO (Sigma-Aldrich, Missouri, USA) for 30 min in the dark at room temperature.  
174 Excitation of AO-stained cells with a 488 nm laser induces green fluorescence in whole cells  
175 and red fluorescence is produced in acidic vesicular organelles (AVOs) due to AO

176 metachromasia. AVOs were gated in a region with an increased ratio of red fluorescence.  
177 The increase of cell granularity, although nonspecific, is a relevant cell stress alteration found  
178 in autophagy and ER stress. High cell granularity was gated in the high side scatter (SSC)  
179 region.

180

## 181 **2.9 Calreticulin (CRT) externalization – flow cytometry**

182 Cells were fixed with 0.25% paraformaldehyde in ice-cold PBS for 5 min and incubated with  
183 anti-CRT (Calreticulin (D3E6) XP Rabbit mAb, Cell Signaling Technology, Danvers, MA, USA,  
184 #12238) 1:300 for 40 minutes, in the dark at 4 °C. Cells were washed with a FACS buffer  
185 (FACS solution supplemented with 4% fetal calf serum) and incubated with anti-rabbit  
186 secondary antibody Alexa Fluor 488<sup>TM</sup> (#4412, Cell Signaling Technology, Danvers, MA,  
187 USA)(1:800) for 40 minutes, in the dark at 4 °C. Cells were centrifuged and resuspended in  
188 the FACS buffer for acquisition in the flow cytometer. The percentage of Ecto-CRT was  
189 counted as Low FSC / CRT<sup>+</sup> population in the DAPI<sup>-</sup> cells.

190

## 191 **2.10 ERp57 (Ser51) externalization measurement – flow cytometry**

192 Cells were fixed with 0.25% paraformaldehyde in ice-cold PBS for 5 min and incubated with  
193 anti-ERp57 (#A484, Rabbit mAb, Cell Signaling Technology, Danvers, MA, USA) 1:100 for  
194 40 minutes, in the dark at 4 °C. Cells were washed with a FACS buffer (FACS solution  
195 supplemented with 4% fetal calf serum) and incubated with anti-rabbit secondary antibody  
196 conjugated with Alexa Fluor 488<sup>TM</sup> (1:400) for 40 minutes, in the dark at 4 °C. Cells were  
197 centrifuged and resuspended in the FACS buffer for acquisition in the flow cytometer. The  
198 mean fluorescence intensity (MFI) related to Ecto-ERp57 was evaluated in the DAPI<sup>-</sup>  
199 population.

200



## 201 **2.11 Evaluation of nuclear HMGB1 - flow cytometry**

202 Cell membranes were permeabilized with 0.1% TritonX 100 solution for 5 minutes. Then cells  
203 were washed with PBS and incubated with anti-HMGB1 conjugated with phycoerythrin (PE)  
204 (# 651403, PE anti-HMGB1; Biolegend, San Diego, CA, USA) for 40 min, in the dark at 4 °C.  
205 After incubation, cells were washed, resuspended in the FACS buffer, and acquired in the  
206 flow cytometer. The HMGB1 release was estimated indirectly by the MFI decreasing in cells  
207 exposed to doxorubicin and CA<sub>5-8</sub> (GOMEZ-CADENA et al., 2016).

208

## 209 **2.12 Evaluation of eIF2 $\alpha$ and P-eIF2 $\alpha$ – flow cytometry**

210 Cell membranes were permeabilized with 0.1% TritonX 100 solution for 5 minutes. Then cells  
211 were washed with PBS and incubated with anti-eIF2 $\alpha$  (#9722, Cell Signaling Technology,  
212 Danvers, MA, USA) or anti-P-eIF2 $\alpha$  (phospho S51) (#9721, Cell Signaling Technology,  
213 Danvers, MA, USA). Antibodies (1:100) were incubated for 40 min at 4 °C. Subsequently,  
214 these cells were washed and incubated with the secondary antibody conjugated with Alexa  
215 Fluor 488 (Biolegend, San Diego, CA, USA) (1:400) for 40 minutes, in the dark at 4 °C. After  
216 cell wash and resuspension in the FACS buffer, the data were acquired by flow cytometry.  
217 MFI of eIF2 $\alpha$  and P-eIF2 $\alpha$  was measured in the DAPI<sup>+</sup> region.

218

## 219 **2.13 ATP release assay**

220 ATP determination kit (#A22066, ThermoFisher Scientific, Inchinnan, UK) based on luciferin-  
221 luciferase conversion was carried out according to the manufacturer's protocol. Briefly, the  
222 supernatant was centrifuged at 1200 rpm for 5 min and 10  $\mu$ L of cleared supernatants of each  
223 condition were transferred to a 96-well plate for luminescence. Then, 90  $\mu$ L of ATP mix  
224 reagent was added to each well. After incubation for 1 min at room temperature, we analyzed

225 luminescence emission in the multimode microplate reader Cytation 3 (Biotek, Vermont,  
226 USA).

227

#### 228 **2.14 Western blot analysis**

229 Total protein extraction was performed using a buffer containing 100 mM Tris (pH 7.6), 1%  
230 Triton X-100, 150 mM NaCl, 2 mM PMSF, 10 mM Na<sub>3</sub>VO<sub>4</sub>, 100 mM NaF, 10 mM Na<sub>4</sub>P<sub>2</sub>O<sub>7</sub>,  
231 and 4 mM EDTA. Equal amounts of protein were used from total extracts followed by SDS-  
232 PAGE, and Western blot analysis with the antibodies indicated, as previously described  
233 (LIPRERI DA SILVA et al., 2021) Antibodies against total and cleaved PARP1 (#9542),  
234 LC3BI/II (#2775), and  $\alpha$ -tubulin (#2144) were obtained from Cell Signaling Technology  
235 (Danvers, MA, USA). Antibody against  $\gamma$ -H2AX (p-Histone H2A.X S139; sc-101696) was  
236 obtained from Santa Cruz Biotechnology (Santa Cruz, CA, USA). Antibody binding was  
237 revealed using a SuperSignal<sup>TM</sup> West Dura Extended Duration substrate system (Thermo  
238 Fisher Scientific) and a G: BOX Chemi XX6 gel document system (Syngene, Cambridge, UK).

239

#### 240 **2.15 Quantitative RT-PCR (qRT-PCR)**

241 B16-F10 cells were seeded on cell culture dishes (90x15mm) and treated with 0.05% DMSO,  
242 chromomycin CA5 (0.1  $\mu$ M), or doxorubicin (0.6  $\mu$ M) for 24 h. Total RNA was obtained using  
243 TRIzol reagent (Thermo Fisher Scientific). cDNA was synthesized from 1  $\mu$ g of RNA using a  
244 High-Capacity cDNA Reverse Transcription Kit (Thermo Fisher Scientific). Quantitative PCR  
245 (qPCR) was performed using a QuantStudio 3 Real-Time PCR System in conjunction with a  
246 SybrGreen System (Thermo Fisher Scientific) in conjunction with a SybrGreen System for the  
247 expression of *Atf4*, *Atf6*, *Atg5*, *Atg7*, *Bak1*, *Bad*, *Bax*, *Bcl2*, *Becn1*, *Carl*, *Hspa4*, *Hspa5* and  
248 *Sqstm1* genes. *Actb* and *Hprt1* were used as reference genes. A negative 'No Template  
249 Control' was included for each primer pair. All procedures were performed according to the

250 manufacturer's instructions. Relative quantification values were calculated using the  $2^{-\Delta\Delta CT}$   
251 equation (LIVAK; SCHMITTGEN, 2001). The heatmap was constructed using the multiple  
252 experiment viewer (MeV) 4.9.0 software (SAEED et al., 2003). The network analysis was  
253 performed using modulated genes by Dox or CA5 groups using the GeneMANIA tool  
254 (WARDE-FARLEY et al., 2010).

255

## 256 **2.16 Vaccination assay**

257 The vaccination assay was performed with a syngeneic mouse model as described by  
258 Gomez-Cadena et al., 2016 with modifications. A syngeneic mouse model (e.g., B16-F10 cell  
259 line in C57BL/6 mice), is an appropriate approach to study cancer therapy with a functional  
260 immune system. The vaccination was performed on day -7 when the mice of the 3  
261 experimental groups (N=7 animals/group) received subcutaneously into the right axilla 200  
262  $\mu\text{L}$  of 0.9% saline solution (Saline), as a negative control, or 200 $\mu\text{L}$  of dying B16-F10 cells  
263 pre-exposed 24 h to 0.1  $\mu\text{M}$  CA<sub>5</sub> (CA5) and 0.6  $\mu\text{M}$  doxorubicin (Dox), as a positive control.  
264 The dying cells were obtained after exposure to cytotoxic agents for 24 h, then harvested,  
265 washed with PBS twice, and resuspended in PBS with  $1.8 \times 10^5$  cells/200  $\mu\text{L}$ . No additional  
266 adjuvants were added. Seven days later, on day 0, mice of Saline, CA5, and Dox groups were  
267 challenged with an injection of  $1.0 \times 10^5$  viable B16-F10 cells in 200  $\mu\text{L}$  of PBS into the left  
268 armpit subcutaneously. The size of the tumors was measured at days 12, 15, and 17 with  
269 digital calipers. The tumor volume was calculated using the following formula: tumor volume  
270 (in  $\text{mm}^3$ ) = [(width)<sup>2</sup> × length] / 2.

271

## 272 **2.17 Statistical analysis**

273 All statistics were performed in GraphPad Prism v6 (GraphPad Software, LLC, San Diego,  
274 CA, USA). Shapiro-Wilk was used to test the normal distribution of results. Data are

275 expressed as means  $\pm$  standard deviation of the mean (SD). Comparisons between C-  
276 and treated groups were performed using the One-Way Analysis of Variance (ANOVA)  
277 followed by Dunnet's post-test for parametric data and using Kruskal-Wallis followed by  
278 Dunn's post-test for nonparametric data. A  $p < 0.05$  value was considered significant.

279

### 280 **3. Results**

#### 281 **3.1 Chromomycins A<sub>5-8</sub> are highly cytotoxic at multiple time exposures**

282 Initially, we performed concentration-effect curves with CA<sub>5-8</sub> varying time exposure to  
283 determine their antiproliferative profile against metastatic melanoma B16-F10 cells (Fig.1).  
284 CA<sub>5</sub> and CA<sub>7</sub> were the most potent compounds, depicting low to mid nM cytostatic and  
285 cytotoxic effects respectively even at short time exposures (Fig. 1A). In addition, CA<sub>6</sub> also  
286 displayed a similar profile at longer exposures. CA<sub>8</sub> induced a potent cytostatic effect,  
287 however, it failed to show cytotoxicity at the nM range. Additionally, CA<sub>5-8</sub> inhibited colony  
288 formation at the nM range of B16-F10 cells incubated for 24 h (Fig. 1B and C).

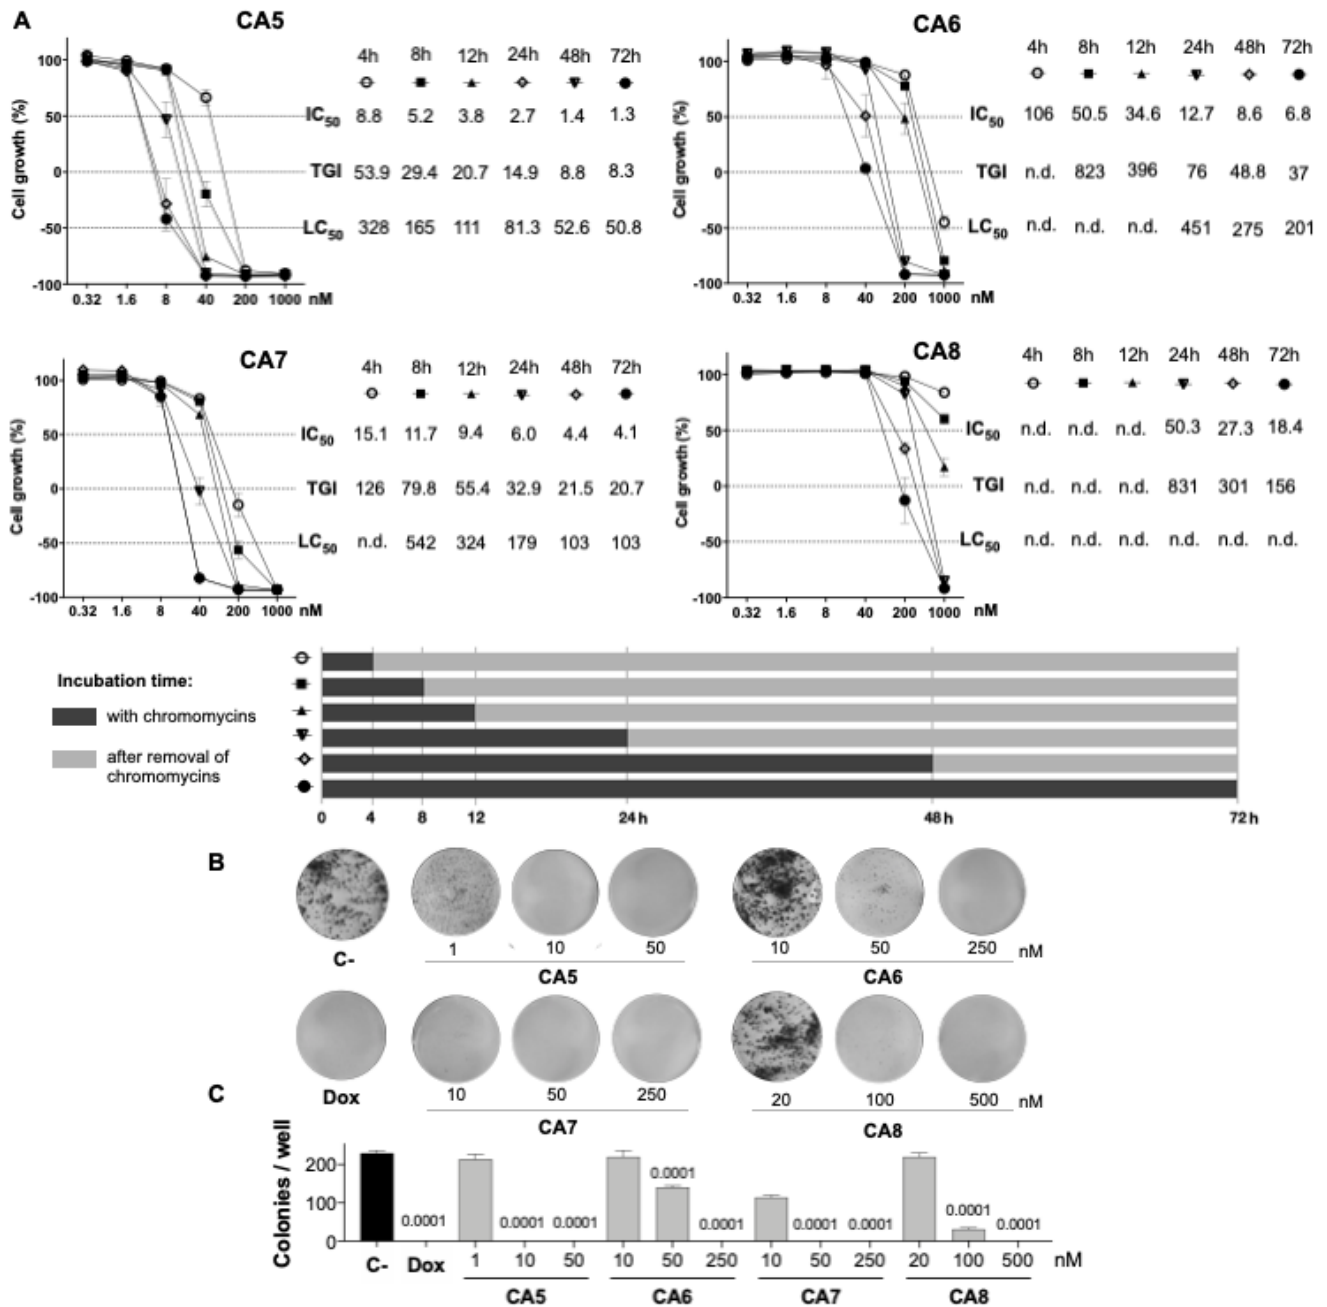

289

290 **Figure 1. Antiproliferative profile of chromomycins A<sub>5-8</sub> on metastatic melanoma B16-**  
 291 **F10 cell line over time.** **A**, Graphs showing the antiproliferative activity of CA<sub>5-8</sub> after different  
 292 exposure periods by the SRB assay. Inhibition concentration mean (IC<sub>50</sub>), total growth  
 293 inhibition (TGI), and lethal concentration mean (LC<sub>50</sub>) values were obtained from interpolation  
 294 of non-linear regression of normalized absorbance of 3 experiments performed in triplicate.  
 295 **B**, Representative photos of the clonogenic assay, and **C**, Number of colonies represented  
 296 as the mean ± standard deviation. 0.05% DMSO (C-) and 0.6 μM doxorubicin (Dox) were  
 297 considered as a negative control and positive control, respectively. Statistical differences of

298 treated groups versus C- are expressed as p values indicated above the columns of the  
299 groups.

300

### 301 3.2 Chromomycins A<sub>5-8</sub> induce apoptosis

302 Immunogenic cell death (ICD) determination requires confirmation of early and late apoptotic  
303 features (GALLUZZI et al., 2020). B16-F10 cells depicted typical apoptosis features after  
304 exposure to CA<sub>5-8</sub> such as cell shrinkage (Fig. 2A and Fig. 2B) and PARP1 cleavage (Fig.  
305 2D). Notably, CA<sub>5</sub> induced intense PARP1 cleavage compared to the other chromomycins,  
306 while the Dox group was similar to C-. All treated groups increased (p<0.0001) the cell death  
307 population subset (Fig. 2B and C). Similar to PARP1 cleavage, CA<sub>5-8</sub> also induced an  
308 increase of  $\gamma$ -H2AX levels, and Dox did not elicit this marker of DNA damage (Fig. 2D).

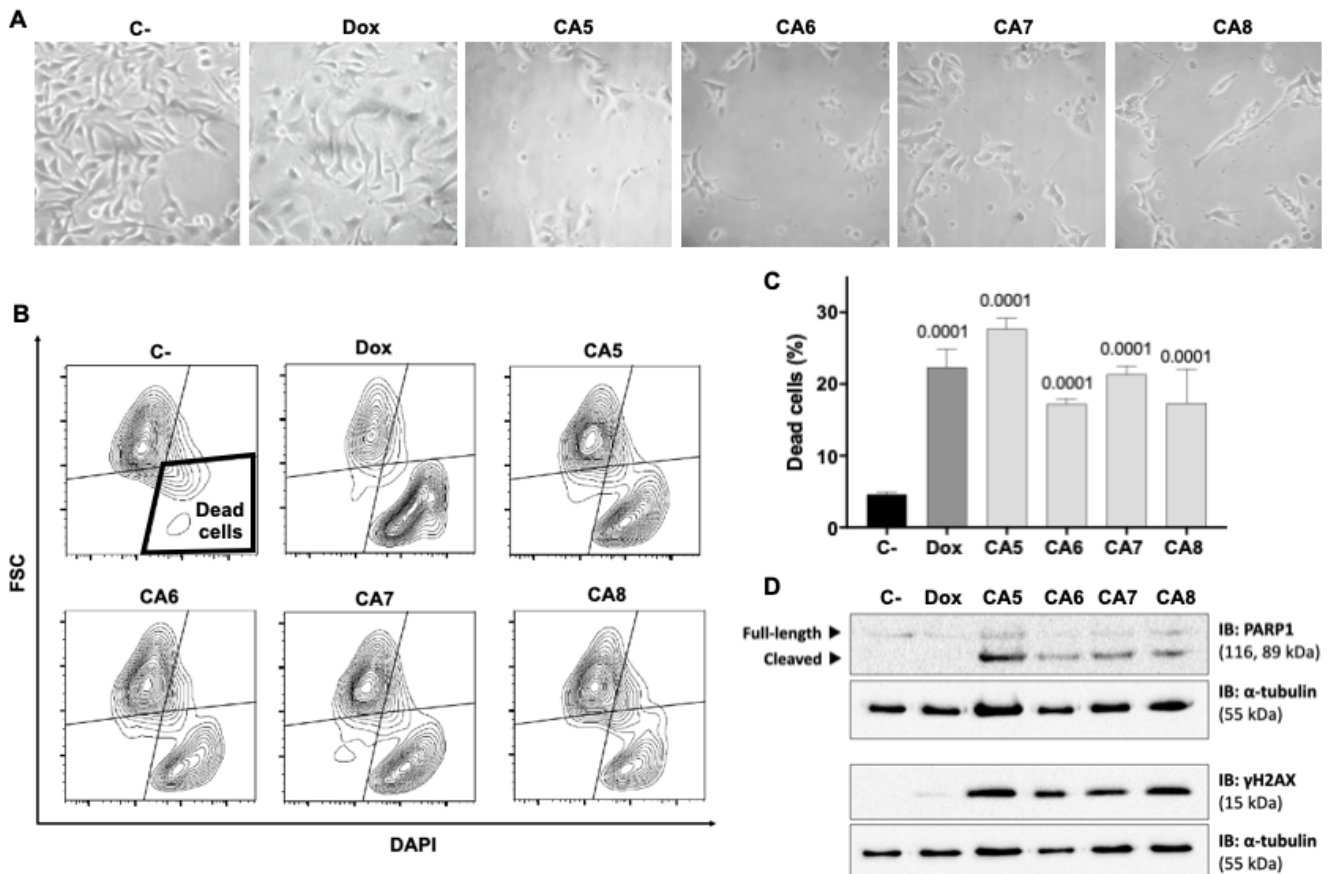

309

310 **Figure 2. Chromomycins A<sub>5-8</sub> induce cellular morphological changes and cell death.** B16-F10  
311 melanoma cells were treated with DMSO (C-), as a negative control, doxorubicin (Dox), as a positive  
312 control, and CA<sub>5-8</sub> (CA5-8) for 24 h. **A**, Phase contrast photomicrographs (200x). **B**, Representative

313 contour plot graphs of the cell death subpopulation gated in the low forward scatter (FSC) and DAPI+  
314 region by flow cytometry and **C**, the respective graph depicting the percentage of dead cells. Data  
315 presented as mean  $\pm$  standard deviation of 3 independent experiments performed in triplicate. The  $p$   
316 values of C- compared to the treated groups are above each treated group. **D**, Expression of cleaved  
317 PARP1 and  $\gamma$ H2AX obtained by Western blot. Values associated with test proteins were normalized  
318 to standard  $\alpha$ -tubulin for the relative expression measure.

319

### 320 **3.3 Chromomycins induce autophagy**

321 ICD inducers elicit cell stress associated with cell demise. Autophagy and endoplasmic  
322 reticulum (ER) stress are phenotypic changes observed quite often with ICD (GARG;  
323 AGOSTINIS, 2014). CA<sub>5-8</sub> and Dox significantly increased the granularity of B16-F10 cells  
324 (Fig. 3A and B). Additionally, CA<sub>5-8</sub> and Dox increased cells with acidic vesicular organelles  
325 (AVOs) (Fig. 3C and D), and LC3B I/II levels as well (Fig. 3E). These data confirm the  
326 autophagy induction by chromomycins on B16-F10 cells.

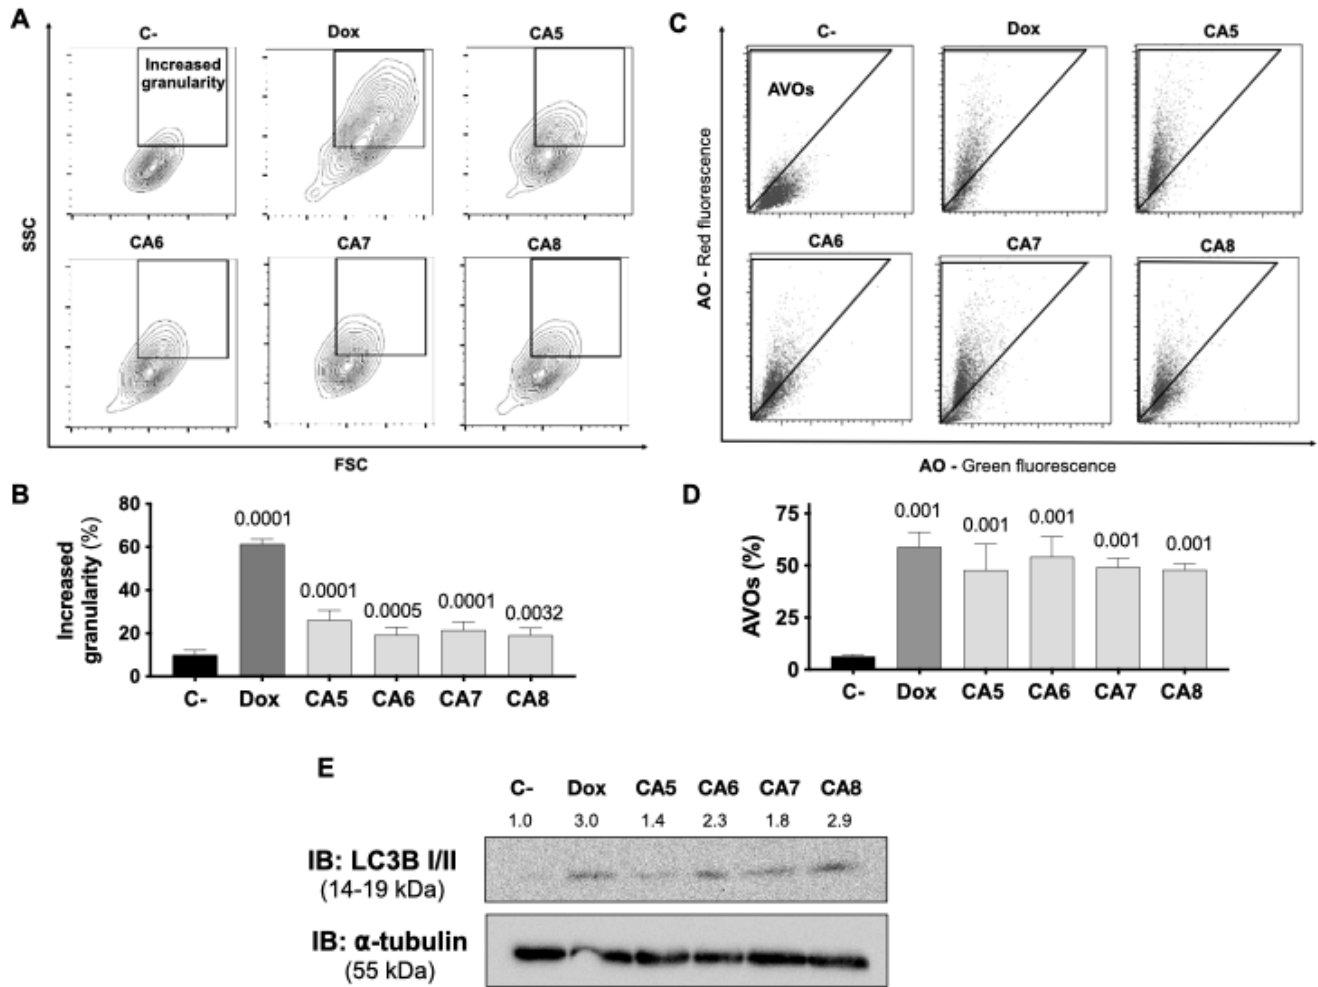

327

328 **Figure 3. Chromomycins A<sub>5-8</sub> induce autophagy.** B16-F10 melanoma cells were treated with DMSO  
 329 (C-), as a negative control, doxorubicin (Dox), as a positive control, and CA<sub>5-8</sub> (CA5-8) for 24 h. **A**,  
 330 Representative contour plot graphs of cells with granularity gated on high side scatter (SSC) and  
 331 average forward scatter (FSC) region by flow cytometry and **B**, the graph depicting the percentage of  
 332 high granularity cells. **C**, Representative dot plots of acridine orange (AO) staining. Acidic vesicular  
 333 organelles (AVOs) were gated on the region with increased red fluorescence by flow cytometry and  
 334 **D**, the graph showing the percentage of AVOs. Data presented in graphs as mean  $\pm$  standard  
 335 deviation of 3 independent experiments performed in triplicate. The *p* values of C- compared to the  
 336 treated groups are above each treated group. **E**, Expression of LC3B I/II protein with values  
 337 normalized by standard  $\alpha$ -tubulin for the relative expression measure.

338

### 339 **3.4 Chromomycins induce the release of ICD related DAMPs**

340 The regulated cell death of B16-F10 exposed to CA<sub>5-8</sub> associated with cell stress is a minimal  
 341 requirement observed in ICD (Fig. 2 and Fig 3). However, the immunogenicity of ICD depends



342 on the damage-associated molecular patterns (DAMPs) releasing. Several DAMPs related to  
343 ICD have been reported so far. Despite this, only a few examples are highly recurrent in ICD,  
344 such as secretion of ATP and HMGB1, a nuclear non-histone nuclear factor, and  
345 externalization to the plasma membrane of CRT, a luminal chaperone of the ER (KROEMER  
346 et al., 2013; RADOGNA; DICATO; DIEDERICH, 2019; GALLUZZI et al., 2020). We observed  
347 nuclear HMGB1 decreasing in B16-F10 cells incubated with CA<sub>5-8</sub> and Dox (Fig. 4A and B).  
348 ATP levels increased significantly, compared to C-, in supernatants of CA<sub>5</sub> exposed cells,  
349 while Dox and CA<sub>6-7</sub> did not change the level of this DAMP (Fig. 4C). Additionally, CA<sub>5-8</sub>  
350 induced CRT externalization in the shrunken cells subpopulation (Fig. 4D, E, and F) and Dox  
351 as well. ATP and HMGB1 act as classic DAMPs, with chemoattractant and activation roles  
352 on APCs as ligands of purinergic receptors (P2Y2 and P2X7) and toll-like receptor 4  
353 respectively. The ecto-CRT is a phagocytic signal recognized by CD91 that promotes antigen  
354 presentation of tumor neoantigens in presence of HMGB1 activation (GALLUZZI et al., 2020;  
355 GARG et al., 2012).

356 ICD is a complex phenomenon in which multiple phenotypic changes are required to allow  
357 the proper immune system activation. In order to compare the putative ICD potential among  
358 compounds used in our pipeline, we scored a total of seven parameters related to cell stress,  
359 cell death, and DAMPs from assays performed with CA<sub>5-8</sub> and Dox as well (SI.1). The sum of  
360 scores for each compound was considered an ICD index, which aided us to understand the  
361 overall immunogenic potential profile of compounds tested in this study. CA<sub>5</sub> depicted the  
362 highest ICD index followed by CA<sub>6</sub> and CA<sub>7</sub>, Dox and CA<sub>8</sub> respectively (Fig. 4G). From this  
363 point, we focused on further analyses of the effects of CA<sub>5</sub>.

364 The co-externalization of ERp57 with CRT is the actual “eat me” signal for phagocytosis by  
365 the APCs with an activation outcome. The B16-F10 cells exposed to CA<sub>5</sub> and Dox presented  
366 ERp57 externalization (Fig. 4H and I). ER stress is an important ICD driver related to

367 externalization of CRT and ERp57, and could initiate autophagy and apoptosis as well. The  
368 eIF2 $\alpha$  is an ER stress protein involved in ICD. Dox-treated cells induced an increase of eIF2 $\alpha$   
369 (Fig. 4J and K), while CA<sub>5</sub> treatment did not change the level of this protein. Nevertheless,  
370 the phosphorylation of eIF2 $\alpha$  at Ser51 is the crucial ICD signaling (BEZU et al., 2018;  
371 HUMEAU et al., 2020). Cells incubated with CA<sub>5</sub> elicited a significant activation of this protein  
372 (Fig. 4L and M). Curiously, Dox did not increase P-eIF2a levels despite the increase of the  
373 overall levels of eIF2a.

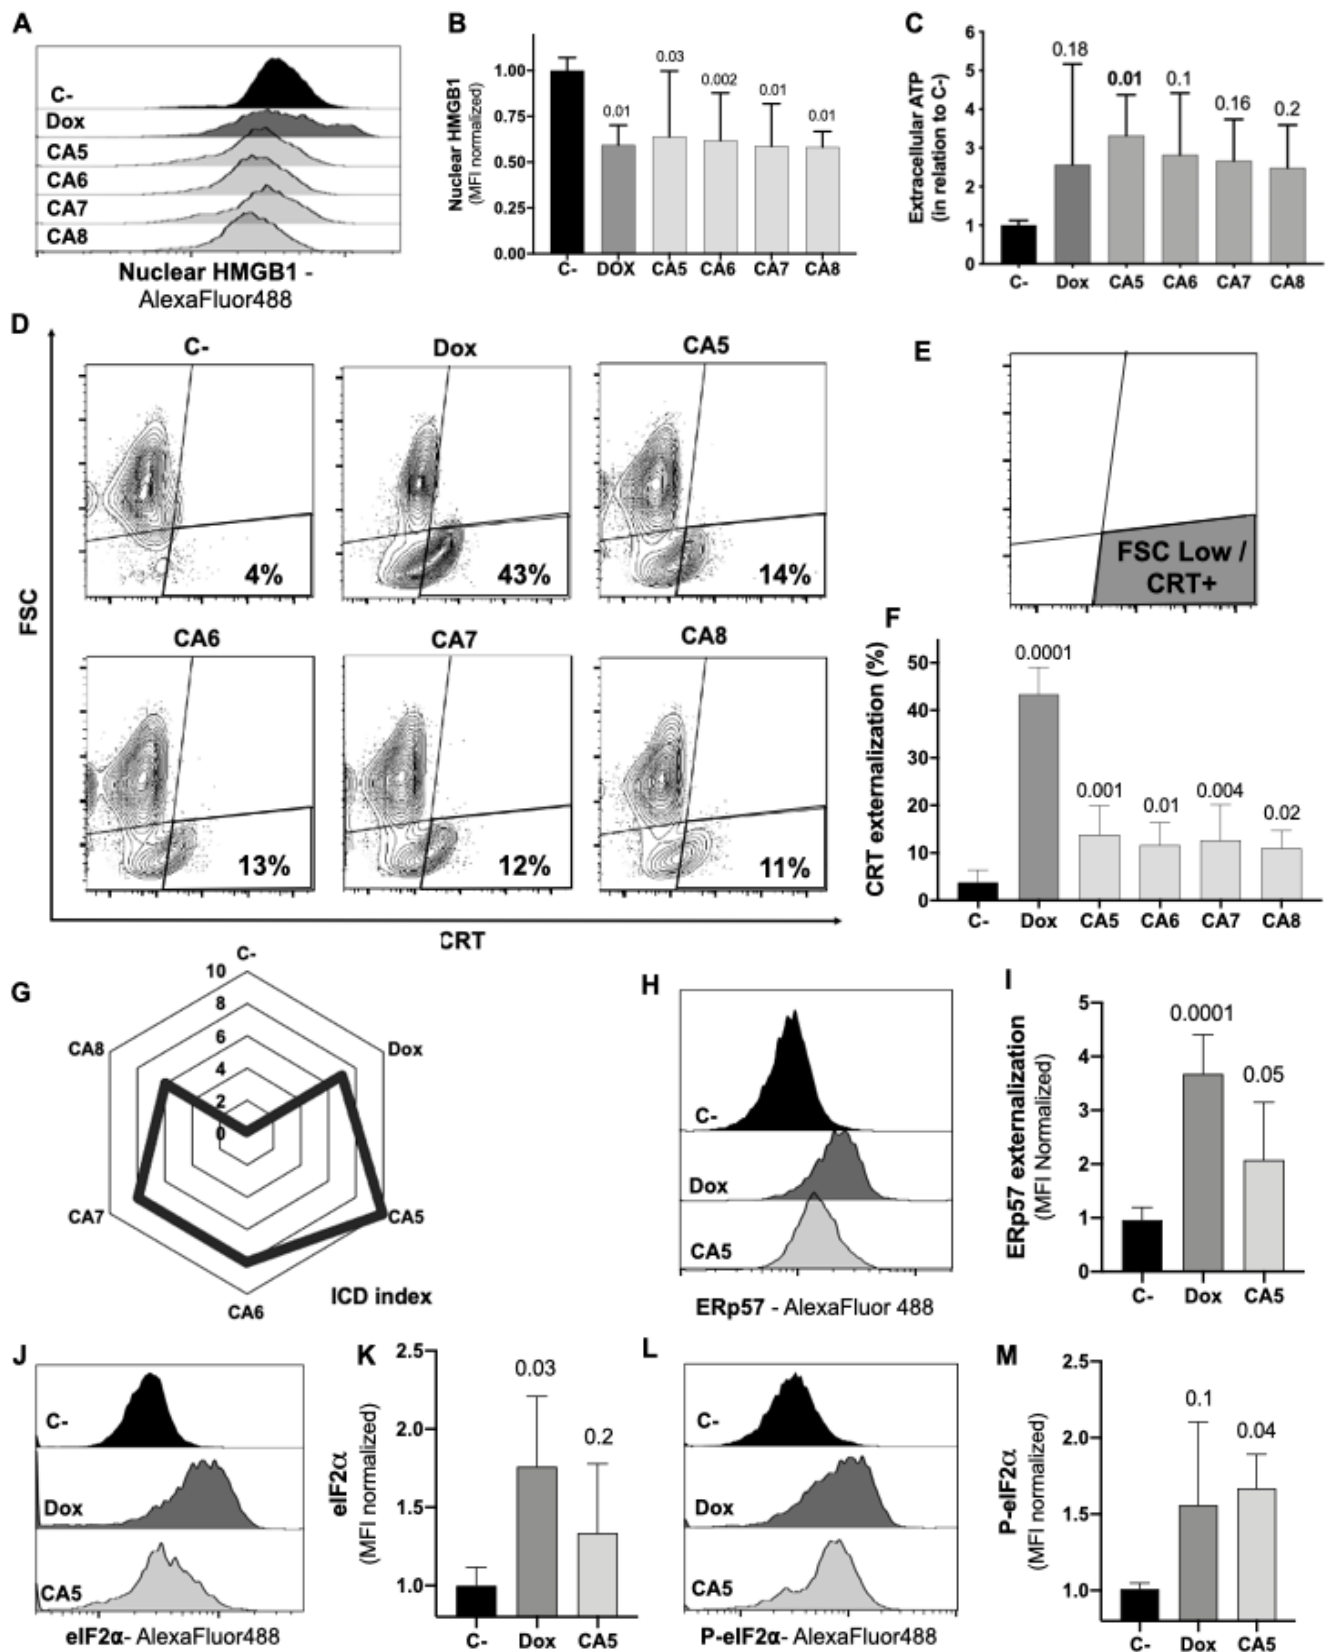

374

375

376

377

**Figure 4. Chromomycins A<sub>5-8</sub> induce the release of immunogenic cell death DAMPs.** B16-F10 melanoma cells were treated with DMSO (C-), as a negative control, doxorubicin (Dox), as a positive control, and CA<sub>5-8</sub> (CA5-8) for 24 h. **A**, Representative histograms of nuclear HMGB1 evaluated by

378 flow cytometry and **B**, graph depicting normalized median fluorescence intensity (MFI) of nuclear  
379 HMGB1. **C**, Normalized extracellular ATP levels measured by luminescence. **D**, Representative  
380 contour plot graphs of calreticulin (CRT) vs cell size (forward scatter, FSC) by flow cytometry, **E**,  
381 Illustration of the gated region of CRT+ cells with low FSC and **F**, graph depicting the percentage of  
382 CRT+ cells. **G**, Radar graph of the index of immunogenic cell death (ICD index). Details of ICD index  
383 are described in SI.1. **H**, Representative histograms of ERp57 evaluated by flow cytometry and **I**,  
384 graph depicting normalized MFI of ERp57. **J**, Representative histograms of eIF2 $\alpha$  evaluated by flow  
385 cytometry and **K**, graph depicting normalized MFI of eIF2 $\alpha$ . **L**, Representative histograms of cells with  
386 eIF2 $\alpha$  phosphorylated at serine 51 (P-eIF2 $\alpha$ ) evaluated by flow cytometry and **M**, graph depicting  
387 normalized MFI of P-eIF2 $\alpha$ . Data presented in graphs as mean  $\pm$  standard deviation of 3 independent  
388 experiments performed in triplicate. The *p* values of C- compared to the treated groups are above  
389 each treated group.

390

### 391 **3.5 CA<sub>5</sub> impacts gene expression related to autophagy, ER stress, and apoptosis**

392 To obtain new insights into the molecular mechanisms involved in the response of B16-F10  
393 cells to CA<sub>5</sub>, we investigated the expression of 13 genes related to autophagy, apoptosis, and  
394 ER stress by quantitative RT-PCR. A total of 7 of out 13 genes was significantly modulated  
395 by CA<sub>5</sub> treatment (6 downregulated [*Atf4*, *Atf6*, *Hspa4*, *Hspa5*, *Atg5*, and *Sqstm1*] and 1  
396 upregulated [*Becn1*], all *p*<0.05), while 5 genes were significantly modulated by Dox  
397 treatment (4 downregulated [*Atf4*, *Hspa4*, *Hspa5*, and *Atg5*] and 1 upregulated [*Bax*] all  
398 *p*<0.05) in B16-F10 cells. Of note, treatment with CA<sub>5</sub>, but nor Dox, significantly increased  
399 the *Becn1/Bcl2* and *Bad/Bcl2* ratios (Fig. 5A-B). The network analysis indicates that CA<sub>5</sub>  
400 induces more complex relationships, which effectively interconnects the processes of  
401 apoptosis, autophagy, and ER stress (Fig. 5C).

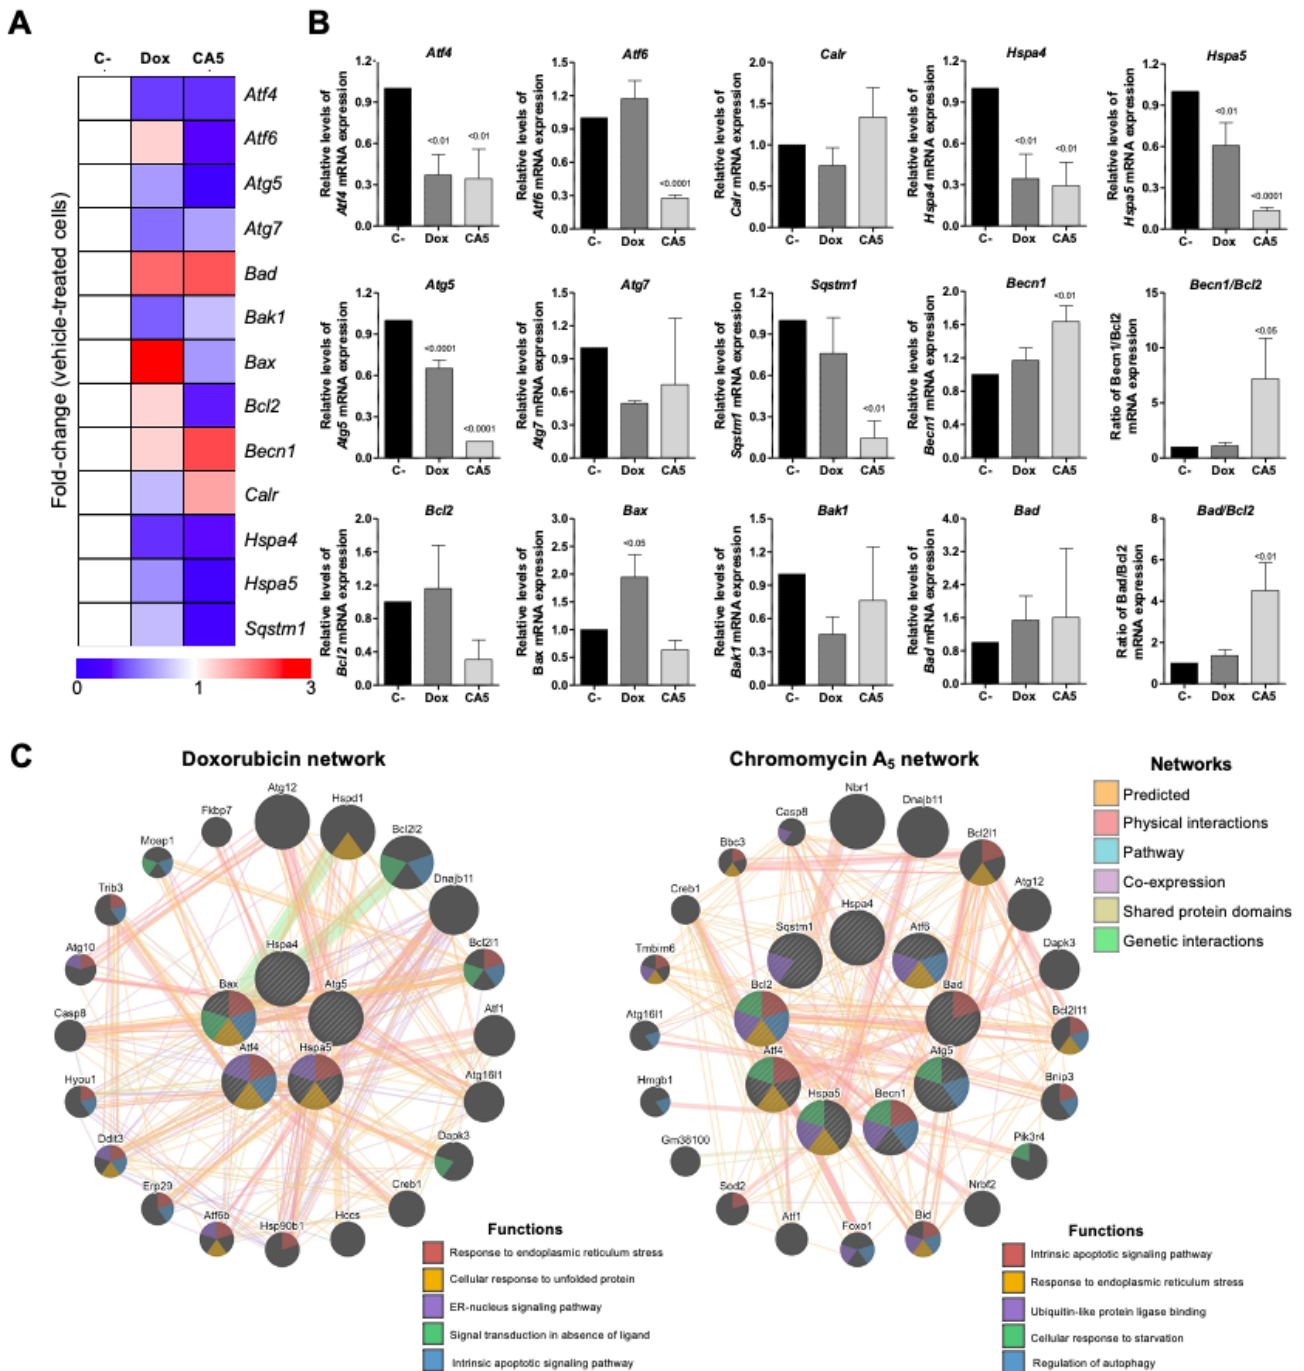

402

403

404

405

406

407

408

409

410

411

**Figure 5. Chromomycin A<sub>5</sub> modulates transcription genes related to endoplasmic reticulum (ER) stress, autophagy, and cell death.** Quantitative RT-PCR was performed for 13 selected genes related to ER stress (*Atf4*, *Atf6*, *Calr*, *Hspa4*, and *Hspa5*); autophagy (*Atg5*, *Atg7*, *Becn1*, and *Sqstm1*); and apoptosis (*Bad*, *Bak1*, *Bax*, and *Bcl2*). **A**, Heatmap illustrating all selected genes in B16-F10 upon a vehicle, Dox (0.6  $\mu$ M) or CA5 (0.1  $\mu$ M) exposure for 24 h. The data are presented as fold-change of the vehicle-treated cells. Downregulated and upregulated genes are illustrated in blue and red, respectively. **B**, The comparison of selected genes are presented in bar graphs and the *p* values are indicated. **C**, Network analysis for genes modulated significantly by Dox or CA5 constructed using the GeneMANIA database (<https://genemania.org/>). The upregulated and downregulated genes in the

412 quantitative RT-PCR are illustrated as strikethrough circles, and the interacting genes included by the  
413 software modeling are indicated by strikethrough strands. The main interactions between genes are  
414 indicated by colored lines and the five main cellular processes are described in the Figure.

415

### 416 3.6 Vaccination of mice with B16-F10 dying cells exposed to CA<sub>5</sub>

417 The vaccination assay using cells dying triggered by a cytotoxic agent is the gold standard  
418 technique for ICD confirmation (KEPP et al., 2014). CA<sub>5</sub>-exposed cells injected 7 days before  
419 the challenge with B16-F10 viable cells developed a significant tumor growth control  
420 protection (Fig. 6). This vaccination effect was not observed with mice of the Dox group. It is  
421 worth highlighting that the dying cells from CA<sub>5</sub> and Dox groups were washed before injection  
422 in a saline solution.

423

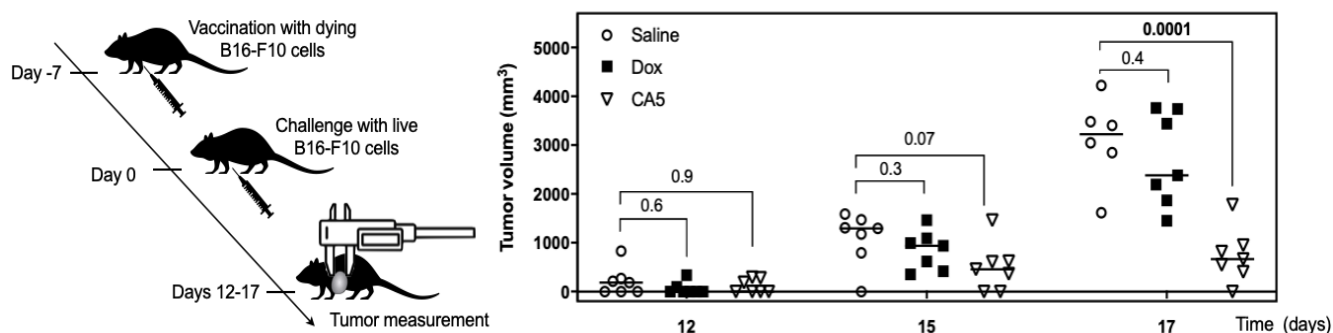

424 **Figure 6. Vaccination with dying B16-F10 cells exposed to chromomycin A<sub>5</sub> confers mice**  
425 **resistance against live B16-F10 cells.** At day -7,  $1.8 \times 10^5$  cells pre-incubated for 24 h with 0.1  $\mu$ M  
426 CA<sub>5</sub> (CA5) and 0.6  $\mu$ M doxorubicin (Dox) were injected subcutaneously in the right armpit of mice. 7  
427 days after vaccination (day 0) mice were challenged with  $1 \times 10^5$  live B16-F10 cells in the left armpit.  
428 The mice of the negative control group (Saline) were injected with saline solution at -7 day and live  
429 B16-F10 cells at day 0. N= 7 mice/group. Tumor growth was monitored until day 17. Differences  
430 between groups are expressed as *p* values indicated above the compared groups.

431

## 432 4. Discussion

433 AMM lacks a therapeutic option to convert immune-cold into immune-hot tumors to improve  
434 the clinical response of the patients who do not respond to the current arsenal available  
435 including immunotherapy (BONAVENTURA et al., 2019). The identification of ICD inducers

436 could fill this need by combining two useful effects at once, direct cytotoxicity against tumor  
437 cells and release of immunological activating signals. This type of regulated cell death allows  
438 the proper activation of the immune system, which in your turn, eliminates tumor cells  
439 resistant to chemotherapy. This mechanism is related to more effective and long-lasting  
440 responses (ZITVOGEL et al, 2008; ZITVOGEL et al., 2010; VANMEERBEEK et al., 2020).  
441 Herein we investigated the ICD induction of four chromomycins obtained from the marine  
442 bacterium *Streptomyces* sp. BRA-384 against metastatic melanoma B16-F10 cells.  
443 Initially, the cytostatic and cytotoxic profiles of CA<sub>5-8</sub> were investigated with increasing time  
444 exposure, and it was observed a time-dependent effect in the nM range. Notably, CA<sub>5</sub> and  
445 CA<sub>7</sub> depicted cytotoxicity in low time-exposure of 4 h and 8 h respectively (Fig. 1A).  
446 Additionally, CA<sub>5-8</sub> completely inhibited colony formation of tumor cells after 24 h incubation  
447 (Fig. 1B). These data highlighted a favorable cytotoxic feature of chromomycins as anticancer  
448 compounds, which must achieve therapeutic plasma levels in a short time window due to  
449 toxicity.

450 The most reliable approach to the initial identification of ICD still consists in performing  
451 multiple phenotypic assays to evaluate autophagy, apoptosis, and releasing of DAMPs on  
452 treated cells *in vitro* (GALLUZZI et al, 2020). In general, cells treated with CA<sub>5-8</sub> and Dox  
453 depicted some ICD features such as apoptosis (Fig. 2), autophagy (Fig. 3) and externalization  
454 of CRT, and releasing of HMGB1 (Fig. 4B, and F). Notably, CA<sub>5</sub>-treated cells depicted the  
455 most consistent ICD profile, filling all phenotypic features investigated so far, followed by CA<sub>6</sub>  
456 and CA<sub>7</sub>, Dox and CA<sub>8</sub> (Fig. 4G). Dox failed to increase cleaved PARP1 on B16-F10 cells, an  
457 apoptosis marker (KAUFMANN et al., 1993; TEWARI et al., 1995) and Dox and CA<sub>6-8</sub> all failed  
458 to release ATP, an essential DAMP involved in the ICD (KEPP et al., 2014; HUMEAU et al.,  
459 2019; VULTAGGIO-POMA; SARTI; VIRGILIO, 2020). CA<sub>5</sub> induced ATP release, ERp57  
460 externalization, and phosphorylation of eIF2 $\alpha$  (Fig. 4C, I and M respectively). Dox increased

461 eIF2 $\alpha$  levels, without significant phosphorylation at serine 51 (Fig. 4K and M). Analyses of  
462 anticancer ICD inducers revealed eIF2 $\alpha$  phosphorylation mediated by eIF2 $\alpha$  kinase-3  
463 (EIF2AK3), but no other signs of ER stress are related to CRT exposure (PANARETAKIS et  
464 al., 2009; BEZU et al., 2018; HUMEAU et al., 2020). Furthermore, machine-learning  
465 approaches revealed eIF2 $\alpha$  phosphorylation as the sole ER stress response relevant to the  
466 algorithm with downstream consequences including CRT exposure, stress granule formation,  
467 and autophagy induction (BEZU et al., 2018; HUMEAU et al., 2020). Although Dox did not  
468 induce a significant increase of phosphorylation of eIF2 $\alpha$ , it induced CRT externalization (Fig.  
469 4F) and increased the high granularity population (Fig. 3A and B) and autophagy (Fig. 3C-E).  
470 This conflicting data could be explained as a masking effect of the increase eIF2 $\alpha$  in Dox-  
471 treated cells (Fig. 4K), which could produce biologically relevant phosphorylation of eIF2 $\alpha$  as  
472 detected by increased ecto-CRT and autophagy.

473 CA<sub>5</sub> and doxorubicin altered expression of transcription of 13 selected genes related to  
474 autophagy, ER stress, and apoptosis. However, CA<sub>5</sub>-treated cells changed most of the genes  
475 evaluated and increased the *Becn1/Bcl2* and *Bad/Bcl2* ratios (Fig. 5A-B) and depicted a wider  
476 interconnected network among apoptosis, autophagy, and ER stress than doxorubicin-treated  
477 cells (Fig. 5C). It is worth highlighting the cellular response to starvation along with ER stress  
478 and apoptosis, as a putative indication of a more intense stress response on CA<sub>5</sub>-treated cells  
479 in comparison to Dox. Activating transcription factors *Atf4* and *Atf6* were downregulated  
480 on CA<sub>5</sub> cells (Fig. 5B). Dox treatment also decreased *Atf4*, however did not alter *Atf6*.  
481 ICD inducers, such as anthracyclines, enhance phosphorylation of eIF2 $\alpha$ , but fail to  
482 stimulate other ER stress signs including the transcriptional activation of activating  
483 transcription factor 4 (ATF4) and the proteolytic cleavage of activating transcription factor  
484 6 (ATF6) (BEZU et al., 2018; HUMEAU et al., 2020). The cellular changes induced by  
485 CA<sub>5</sub> are summarized in the Fig. 7 along with the expected effect on dendritic cells.



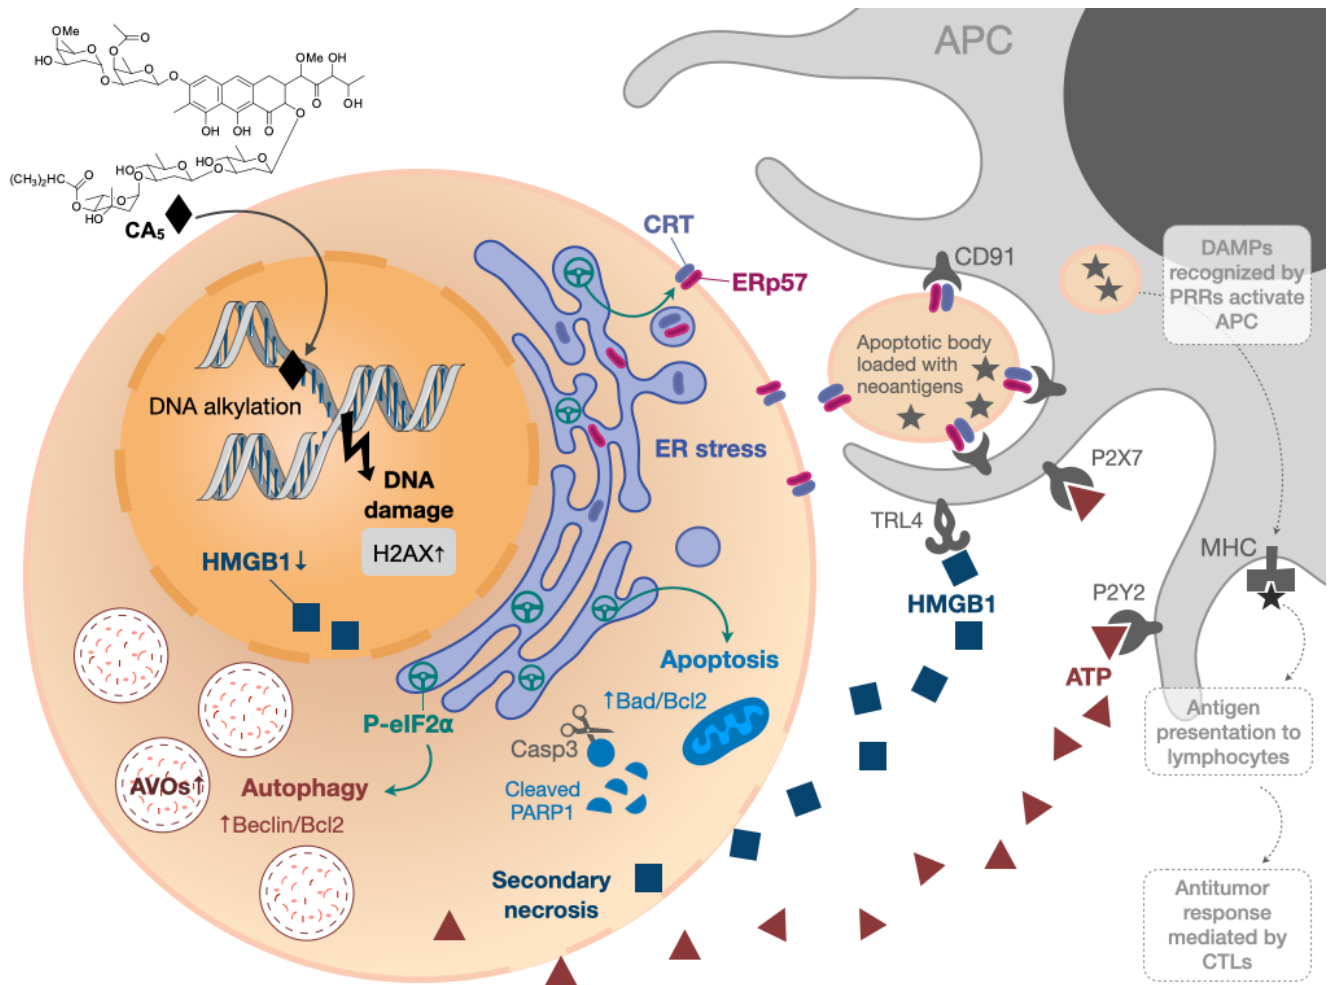

486

487 **Figure 7. Overview of immunogenic cell death (ICD) induced by chromomycin A<sub>5</sub> (CA<sub>5</sub>) in**  
488 **metastatic melanoma.** B16-F10 cells treated with CA<sub>5</sub> displayed cell stress and cell death along with  
489 release of damage-associated molecular patterns (DAMPs) which are supposed to activate antigen  
490 presenting cells (APC) and generating an effective cellular immune response. The phosphorylation of  
491 eIF2 $\alpha$  due to endoplasmic reticulum (ER) stress drives crucial immunogenic events, as externalization  
492 of the “eat me” signals calreticulin (CRT) and ERp57, autophagy and apoptosis. AVOs, acidic  
493 vesicular organelles; Casp3, caspase 3; PRRs, pattern recognition receptors; CTLs, cytotoxic T  
494 lymphocytes.

495

496 The vaccination assay is the gold standard method to confirm ICD, due to its complex spatio-  
497 temporal nature. Dying cells undergoing bonafide ICD must effectively recruit and activate  
498 both APCs and lymphocytes without any external adjuvants. The vaccination efficacy is  
499 evaluated by challenging mice with live cells of the same lineage (KEPP et al., 2014;  
500 HUMEAU et al., 2019; VANMEERBEEK et al., 2020). C57BL/6 mice vaccinated with CA<sub>5</sub>-

501 treated cells controlled tumor growth efficiently (Fig. 6). At day 17 the mean tumor volume of  
502 mice of the CA5 group was significantly lower ( $p=0.0001$ ) than the mean tumor volume of the  
503 Saline group. Actually, animals from the CA5 group showed only 20% of the mean saline  
504 tumor volume, and one animal did not develop a tumor at all. This result confirms CA<sub>5</sub> as a  
505 bonafide ICD inducer. Tumors of the Dox group did not show a significant difference from the  
506 negative control ( $p = 0.4$ ). Gomez-Cadena et al. (2016) reported significant tumor control of  
507 C57L/6 mice vaccinated with Dox-treated B16-F10 cells. In their study, the cell treatment with  
508 doxorubicin was longer (48 h), and caspase 3 activation confirmed apoptosis induction.  
509 However, the ATP levels in supernatants of Dox-treated cells did not increase either, similar  
510 to our results as we found in the present study.

511 Fine-tuning *in vitro* conditions to confirm the induction of ICD is challenging and some studies  
512 could fail to demonstrate it depending on the histological origin of cells and time and  
513 concentrations of exposure used as well (SUKKURWALA et al., 2014). Most ICD inducers,  
514 such as doxorubicin, oxaliplatin, bortezomib and vinca alkaloids, were identified using tumor  
515 cell lines from different tumor origins of clinical practice (MENGER et al., 2012;  
516 SUKKURWALA et al., 2014). Although this approach generated robust knowledge about ICD  
517 inducers initially, it led to delayed identification of some important ICD inducer anticancer  
518 agents, including paclitaxel and cisplatin (LAU et al., 2020; SOLARI et al., 2020). Similarly,  
519 other chromomycins, including CA<sub>7-8</sub> studied here, also induce ICD depending on  
520 experimental design; however further studies are needed to fully characterize ICD triggered  
521 by chromomycins. Additionally, the suboptimal results we obtained with melanoma cells  
522 exposed to doxorubicin, an important ICD inducer used in the treatment of several solid and  
523 hematological cancers (e.g. breast, ovary, prostate and multiple myeloma), also illustrates  
524 the challenge of identifying experimental conditions that trigger ICD.

525 A few chemotherapeutic agents are known to induce ICD, and they demonstrate remarkable  
526 clinical performance (KEPP; SENOVILLA; KROEMER, 2014), CA<sub>5</sub> shows evidence of ICD  
527 and thus is a highly promising candidate for AMM and deserves further preclinical studies. It  
528 is also worth highlighting the supply as one important bottleneck to the preclinical and clinical  
529 development of pharmaceuticals (JIMENEZ et al., 2020). We obtained CA<sub>5</sub> for this study using  
530 a sustainable and easily scalable technique (PINTO et al., 2019), and its supply for studies *in*  
531 *vivo* is quite feasible. In summary, we identified CA<sub>5</sub> as a bonafide inducer of ICD in metastatic  
532 melanoma cells. Further *in vivo* studies with CA<sub>5</sub> are necessary to evaluate antitumor activity,  
533 toxicity, and survival, as well as the effect on CA<sub>5</sub> associated with immunotherapy.

534

### 535 **Acknowledgements**

536 We thank to Dr. Margo Haygood for reviewing the manuscript. This study was financed in part  
537 by the Coordenação de Aperfeiçoamento de Pessoal de Nível Superior - Brasil (CAPES) -  
538 Finance Code 001, Instituto Nacional de Ciência e Tecnologia (INCT BioNat-CNPq/FAPESP,  
539 No. 465637/2014-0) and Fundação de Amparo à Pesquisa do Estado de São Paulo  
540 (2019/23864-7). The authors also thank the Multi-User Facility of Drug Research and  
541 Development Center of Federal University of Ceará for technical support.

542

### 543 **Conflict of Interest**

544 None.

545

### 546 **Author Contributions**

547 **Katharine Gurgel Dias Florêncio:** Methodology, Validation, Writing - Original Draft, Formal  
548 analysis, Investigation, Visualization **Evelline Araújo Edson:** Methodology, Validation,  
549 Investigation, Formal analysis **Francisco das Chagas Lima Pinto:** Methodology, Validation,

550 Investigation **Otília Deusdênia Loiola Pessoa**: Validation, review the manuscript **João**  
551 **Agostinho Machado Neto**: Methodology, Validation, Formal analysis, Investigation **Diego**  
552 **Veras Wilke**: Conceptualization, Funding acquisition, Supervision, Validation, Writing -  
553 Review & Editing.

554

## 555 **References**

556 ATKINS, B. M. B. et al. High-Dose Recombinant Interleukin 2 Therapy for Patients With  
557 Metastatic Melanoma: Analysis of 270 Patients Treated Between 1985 and 1993. 2016.

558 BEZU, L. et al. eIF2  $\alpha$  phosphorylation is pathognomonic for immunogenic cell death. **Cell**  
559 **Death & Differentiation**, v. 25, p. 1375 – 1393, 2018.

560 BONAVENTURA, P. et al. Cold Tumors: A Therapeutic Challenge for Immunotherapy.  
561 **Frontiers in Immunology**, v. 10, p. 168, 2019.

562 BROWN AND TORKELSON. Long-term follow-up stage III testicular carcinoma treated with  
563 mithramycin (plicamycin). **Med Pediatr Oncol**, v. 24, p. 327–328, 1995.

564 CHAKRABORTY, H. et al. **New Functions of Old Drugs: Aureolic Acid Group of Anti-**  
565 **Cancer Antibiotics and Non-Steroidal Anti-Inflammatory Drugs**. [s.l.] Elsevier, 2014. v. 1

566 DUTCHER, J. P. et al. A pilot study of alpha-interferon and plicamycin for accelerated phase  
567 of chronic myeloid leukemia. **Leukemia Research**, v. 21, n. 5, p. 375–380, 1997.

568 FRANKEN, N. A. P. et al. Clonogenic assay of cells in vitro. **Nature Protocols**, v. 1, n. 5, p.  
569 2315–2319, 2006.

570 GALLUZZI, L. et al. Immunogenic cell death in cancer and infectious disease. **Nature**  
571 **Reviews Immunology**, v. 17, n. 2, p. 97–111, 2017.

572 GALLUZZI, L. et al. Consensus guidelines for the definition, detection and interpretation of  
573 immunogenic cell death. **Journal for ImmunoTherapy of Cancer**, v. 8, n. 1, p. 1–22, 2020.

574 GARG, A. D. et al. A novel pathway combining calreticulin exposure and ATP secretion in

- 575 immunogenic cancer cell death. **The EMBO Journal**, v. 31, n. 5, p. 1062–1079, 2012.
- 576 GARG, A. D. et al. Danger signalling during cancer cell death: Origins, plasticity and  
577 regulation. **Cell Death and Differentiation**, v. 21, n. 1, p. 26–38, 2014.
- 578 GARG, A. D.; AGOSTINIS, P. ER stress, autophagy and immunogenic cell death in  
579 photodynamic therapy-induced anti-cancer immune responses. **Photochemical and**  
580 **Photobiological Sciences**, v. 13, n. 3, p. 474–487, 2014.
- 581 GOMEZ-CADENA, A. et al. Immune-system-dependent anti-tumor activity of a plant-derived  
582 polyphenol rich fraction in a melanoma mouse model. **Cell Death and Disease**, v. 7, n. 6, p.  
583 1–12, 2016.
- 584 GUIMARÃES, L. A. et al. Chromomycin A2 induces autophagy in melanoma cells. **Marine**  
585 **Drugs**, v. 12, n. 12, p. 5839–5855, 2014.
- 586 HUMEAU, J. et al. Gold standard assessment of immunogenic cell death in oncological  
587 mouse models. **Methods in Molecular Biology**, v. 1884, p. 297–315, 2019.
- 588 HUMEAU, J. et al. EIF2 $\alpha$  phosphorylation: a hallmark of both autophagy and immunogenic  
589 cell death. **Molecular and Cellular Oncology**, v. 7, n. 5, 2020.
- 590 JIMENEZ, P. C. et al. Enriching cancer pharmacology with drugs of marine origin. n. February  
591 2019, p. 3–27, 2020.
- 592 KAKADIA, S. et al. Mechanisms of resistance to BRAF and MEK inhibitors and clinical update  
593 of US Food and Drug Administration-approved targeted therapy in advanced melanoma.  
594 **OncoTargets and Therapy**, p. 7095–7107, 2018.
- 595 KAUFMANN, S. H. et al. Specific Proteolytic Cleavage of Poly ( ADP-ribose ) Polymerase :  
596 An Early Marker of. **Cancer Research**, v. 53, p. 3976–3985, 1993.
- 597 KEPP, O. et al. Consensus guidelines for the detection of immunogenic cell death.  
598 **Oncolmunology**, v. 3, n. 9, p. 37–41, 2014.
- 599 KEPP, O. et al. Clinical evidence that immunogenic cell death sensitizes to PD-1 / PD-L1

600 blockade Clinical evidence that immunogenic cell death sensitizes to PD-1 / PD-L1 blockade.  
601 **Oncolmunology**, v. 8:10, p. 1–4, 2019.

602 KEPP, O.; SENOVILLA, L.; KROEMER, G. Immunogenic cell death inducers as anticancer  
603 agents. **Oncotarget**, v. 5 (14), p. 5190–5191, 2014.

604 KORMANEC, J. et al. The antitumor antibiotic mithramycin: new advanced approaches in  
605 modification and production. **Applied Microbiology and Biotechnology**, v. 104, n. 18, p.  
606 7701–7721, 2020.

607 KROEMER, G. et al. Immunogenic cell death in cancer therapy. **Annual Review of**  
608 **Immunology**, v. 31, p. 51–72, 2013.

609 LARKIN, J. et al. Combined Nivolumab and Ipilimumab or Monotherapy in Untreated  
610 Melanoma. **New England Journal of Medicine**, v. 373, n. 13, p. 1270–1271, 2015.

611 LAU, T. S. et al. Paclitaxel Induces Immunogenic Cell Death in Ovarian Cancer via TLR4 /  
612 IKK2 / SNARE-Dependent Exocytosis. **Cancer Immunology Research**, p. 1099–1112,  
613 2020.

614 LAURENCE, Z.; KROEMER, L. A. F. G. AND G. Immunological aspects of cancer  
615 chemotherapy. v. 8, n. january, p. 59–73, 2008.

616 LIPRERI DA SILVA, J. C. et al. Comprehensive analysis of cytoskeleton regulatory genes  
617 identifies ezrin as a prognostic marker and molecular target in acute myeloid leukemia.  
618 **Cellular Oncology**, 2021.

619 LIVAK, K. J.; SCHMITTGEN, T. D. Analysis of relative gene expression data using real-time  
620 quantitative PCR and the 2- $\Delta\Delta$ CT method. **Methods**, v. 25, n. 4, p. 402–408, 2001.

621 MARTINS, I. et al. Premortem autophagy determines the immunogenicity of chemotherapy-  
622 induced cancer cell death. **Autophagy**, v. 8:3, p. 413–415, 2012.

623 MENGER, L. et al. Cardiac Glycosides Exert Anticancer Effects by Inducing Immunogenic  
624 Cell Death. **Sci Transl Med**, v. 4(143), 2012.

- 625 PANARETAKIS, T. et al. Mechanisms of pre-apoptotic calreticulin exposure in immunogenic  
626 cell death. **EMBO Journal**, v. 28, n. 5, p. 578–590, 2009.
- 627 PINTO, F. C. et al. Dextrorotatory Chromomycins from the Marine. v. 31, n. 0, p. 1–10, 2019.
- 628 QUEIROLO, P. et al. Immune-checkpoint inhibitors for the treatment of metastatic melanoma:  
629 a model of cancer immunotherapy. **Seminars in Cancer Biology**, n. June, p. 0–1, 2019.
- 630 RADOGNA, F.; DICATO, M.; DIEDERICH, M. Natural modulators of the hallmarks of  
631 immunogenic cell death. **Biochemical Pharmacology**, v. 162, n. January, p. 55–70, 2019.
- 632 SAEED, A. I. et al. TM4: A free, open-source system for microarray data management and  
633 analysis. **BioTechniques**, v. 34, n. 2, p. 374–378, 2003.
- 634 SAHM, B. D. B. et al. Targeting the Oncogenic TBX2 Transcription Factor With  
635 Chromomycins. **Frontiers in Chemistry**, v. 8, n. March, p. 1–9, 2020.
- 636 SKEHAN, P. et al. New Colorimetric Cytotoxicity Assay for. **Journal of the National Cancer**  
637 **Institute**, v. 82, n. 13, p. 1107–1112, 1990.
- 638 SNYDER, R. C. et al. Mithramycin Blocks Transcriptional Initiation of the c-myc P1 and P2  
639 Promoters. **Biochemistry**, v. 30, n. 17, p. 4290–4297, 1991.
- 640 SOLARI, J. I. G. et al. Damage-associated molecular patterns (DAMPs) related to  
641 immunogenic cell death are differentially triggered by clinically relevant chemotherapeutics in  
642 lung adenocarcinoma cells. **BMC Cancer**, v. 20, n. 1, p. 1–14, 2020.
- 643 SUKANYA CHAKRABARTI<sup>1</sup>, D. D. AND; BHATTACHARYYA, D. Role of Mg<sup>2+</sup> in  
644 Chromomycin A3 –DNA Interaction: A Molecular Modeling Study. **Journal of Biological**  
645 **Physics**, v. 26, n. 1–4, p. 203–214, 2000.
- 646 SUKKURWALA, A. Q. et al. Screening of novel immunogenic cell death inducers within the  
647 NCI mechanistic diversity set. **Onc Immunology**, v. 3, n. 4, 2014.
- 648 TAGASHIRA, M; KITAGAWA, T; ISONISHI, S; OKAMOTO, A; OCHIAI, K. AND O. Y.  
649 Mithramycin Represses MDR1 Gene Expression in Vivo, Modulating Multidrug Resistance.

650 **Biol Pharm Bull**, v. 23, n. 8, p. 926–929, 2000.

651 TEWARI, M. et al. Yama / CPP3213 , a Mammalian Homolog of CED-3 , Is a CrmA-Inhibitable  
652 Protease That Cleaves the Death Substrate Poly ( ADP-Ribose ) Polymerase. v. 81, p. 801–  
653 809, 1995.

654 THOMÉ, M. P. et al. Ratiometric analysis of Acridine Orange staining in the study of acidic  
655 organelles and autophagy. **Journal of Cell Science**, v. 129, n. 24, p. 4622–4632, 2016.

656 VANMEERBEEK, I. et al. Trial watch: chemotherapy-induced immunogenic cell death in  
657 immuno-oncology. **Oncolimmunology**, v. 9, n. 1, 2020.

658 VULTAGGIO-POMA, V.; SARTI, A. C.; VIRGILIO, F. DI. Extracellular ATP : A Feasible Target  
659 for Cancer Therapy. 2020.

660 WARDE-FARLEY, D. et al. The GeneMANIA prediction server: Biological network integration  
661 for gene prioritization and predicting gene function. **Nucleic Acids Research**, v. 38, n.  
662 SUPPL. 2, p. 214–220, 2010.

663 ZITVOGEL, L. et al. Immunogenic Tumor Cell Death for Optimal Anticancer Therapy : The  
664 Calreticulin Exposure Pathway. 2010.

665

666

667

668

669

670

671

672

673

674



675

## Supplementary information

676

### 677 **Chromomycin A<sub>5</sub> induces bonafide immunogenic cell death in metastatic melanoma**

678 Katharine G. D. Florêncio<sup>1</sup>, Evelline A. Edson<sup>1</sup>, João Agostinho Machado-Neto<sup>2</sup>, Francisco

679 C. L. Pinto<sup>3</sup>, Otilia D. L. Pessoa<sup>3</sup> and Diego V. Wilke<sup>1,\*</sup>

680

681 **SI.1. Immunogenic cell death (ICD) index.** Seven parameters related to cell stress, cell  
682 death, and release of DAMPs from assays performed with CA<sub>5-8</sub> and Dox were scored, based  
683 on statistical significance compared to negative control (C-) as 0 when p>0.05; 1 for  
684 cytotoxicity and autophagy parameters with p<0.05; and 2 for DAMPs releasing\* with p<0.05.

685 The sum of scores for each compound was considered the ICD index.

| Cellular phenotype     |                     | C-       | Dox      | CA5       | CA6      | CA7      | CA8      |
|------------------------|---------------------|----------|----------|-----------|----------|----------|----------|
| Citotoxicity           | Membrane disruption | 0        | 1        | 1         | 1        | 1        | 1        |
|                        | Cleaved PARP1       | 0        | 0        | 1         | 1        | 1        | 1        |
| Autophagy              | AVOs                | 0        | 1        | 1         | 1        | 1        | 1        |
|                        | LC3B I/II           | 0        | 1        | 1         | 1        | 1        | 1        |
| DAMP releasing         | <b>HMGB1</b>        | 0        | 2        | 2         | 2        | 2        | 2        |
|                        | <b>ATP</b>          | 0        | 0        | 2         | 0        | 0        | 0        |
|                        | <b>CRT</b>          | 0        | 2        | 2         | 2        | 2        | 0        |
| <b>ICD index (sum)</b> |                     | <b>0</b> | <b>7</b> | <b>10</b> | <b>8</b> | <b>8</b> | <b>6</b> |

686

687 \*The higher value of score for DAMPs releasing was arbitrarily chosen as an attempt to

688 represent their critical importance on ICD induction.
